# Supplementary material
Source: PubMed Central journal article supplement (PMC4878725)

### Supplementary Text

The following formula describes how to compute the posterior probability that arm A is superior to arm B given  $x_A$  deaths in arm A and  $x_B$  deaths in arm B, i.e.,  $P(p_A < p_B)$ , where  $p_A$  and  $p_B$  are mortality probabilities in arms A and B, respectively.

$$P(p_A < p_B | x_A, x_B) = \int_0^1 G_A(p|x_A)g_B(p|x_B)dp = \sum_{k=x_{A+1}}^{n_A+1} \frac{\binom{n_A+1}{k} \binom{n_B+1}{x_B} (n_B - x_B + 1)}{\binom{n_A+n_B+2}{x_B+k} (n_A+n_B-x_B-k+2)}$$

where  $G_A(p|x_A)$  denotes the beta cumulative distribution function for arm A given observed deaths  $x_A$  and  $g_B(p|x_B)$  denotes the beta density function given observed deaths  $x_B$ . The notation  $\binom{n}{k}$  denotes the “n choose k” function. Having observed 10 subjects in each arm in total, and observing 2 deaths in arm A and 6 deaths in arm B gives a posterior probability (that arm A has a lower mortality rate than arm B) of 0.96.

Supplementary Figure 1. Differences in number of deaths required to cross boundary at different interim analyses

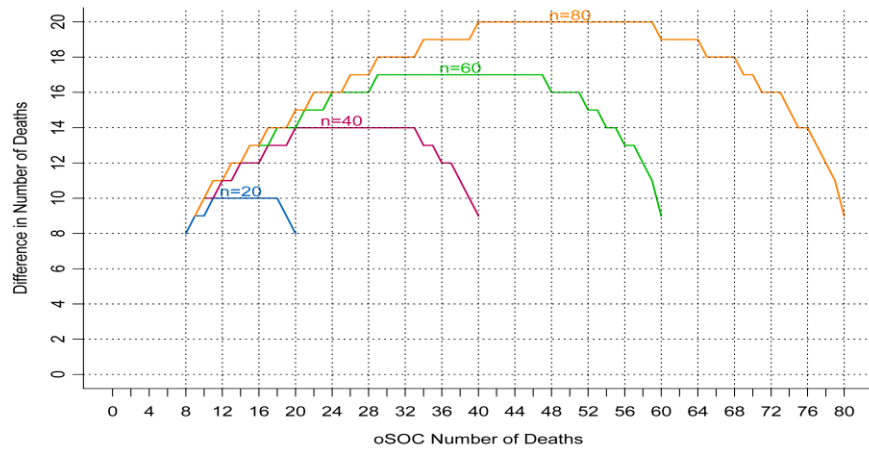

Supplementary Figure 2. Type I error rates for various sample sizes and various underlying mortality rates

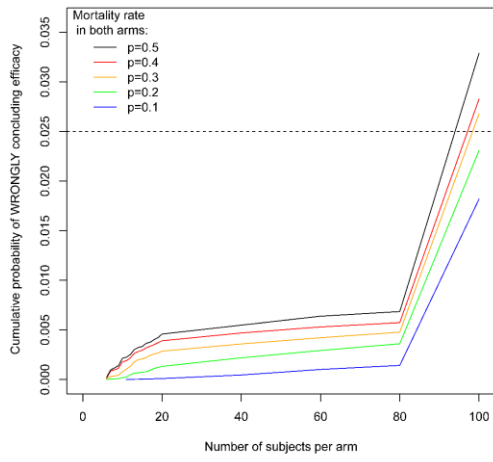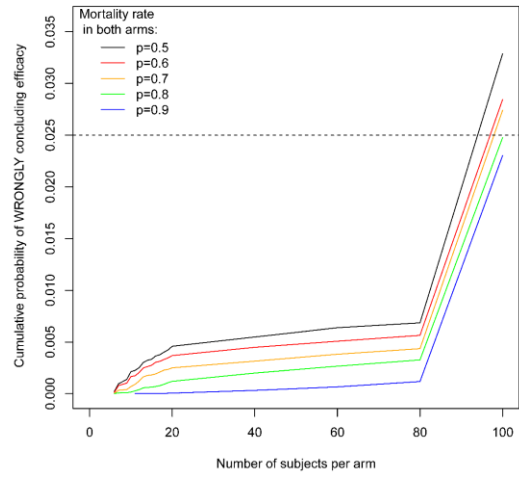

Supplement: supp_jiw061_jiw061supp.pdf [file supp_jiw061_jiw061supp.pdf]
